# Supplementary material for: Inhibition of PRMT1 Suppresses the Growth of U87MG-Derived Glioblastoma Stem Cells by Blocking the STAT3 Signaling Pathway
Source: MDPI journal article supplement (doi:10.3390/ijms25052950), 2024-03-03
Supplement: s1 [file s1]

Article

# Inhibition of PRMT1 Suppresses the Growth of U87MG-Derived Glioblastoma Stem Cells by Blocking the STAT3 Signaling Pathway

Nayeong Yuk<sup>1</sup> and Hye Jin Jung<sup>1,2,3,\*</sup>

<sup>1</sup> Department of Life Science and Biochemical Engineering, Graduate School, Sun Moon University, Asan 31460, Republic of Korea; nayeong7249@sunmoon.ac.kr

<sup>2</sup> Department of Pharmaceutical Engineering and Biotechnology, Sun Moon University, Asan 31460, Republic of Korea

<sup>3</sup> Genome-Based BioIT Convergence Institute, Sun Moon University, Asan 31460, Republic of Korea

\* Correspondence: poka96@sunmoon.ac.kr; Tel.: +82-41-530-2354; Fax: +82-41-530-2939

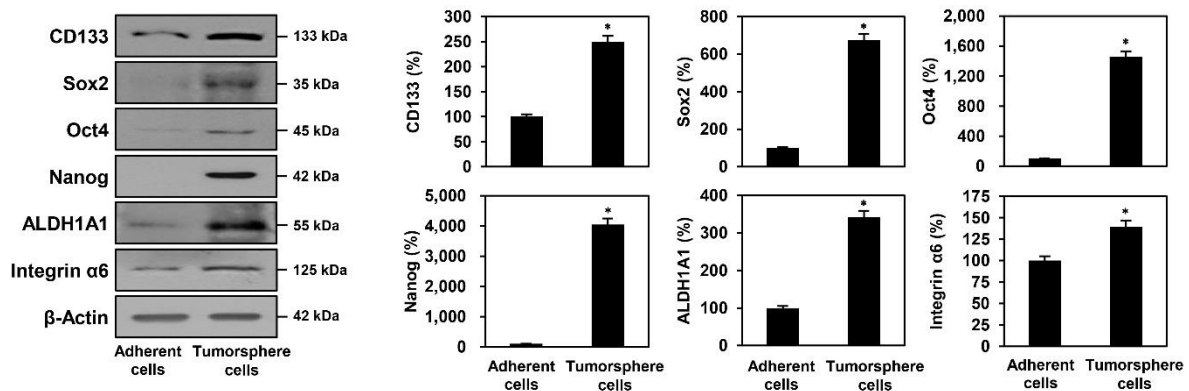

**Figure S1.** Protein expression levels of key GSC markers in U87MG adherent and tumorsphere cells. Protein levels were detected by western blotting and quantified by densitometry.  $\beta$ -Actin levels were used as a loading control. \*  $p < 0.05$  vs. the adherent cells.

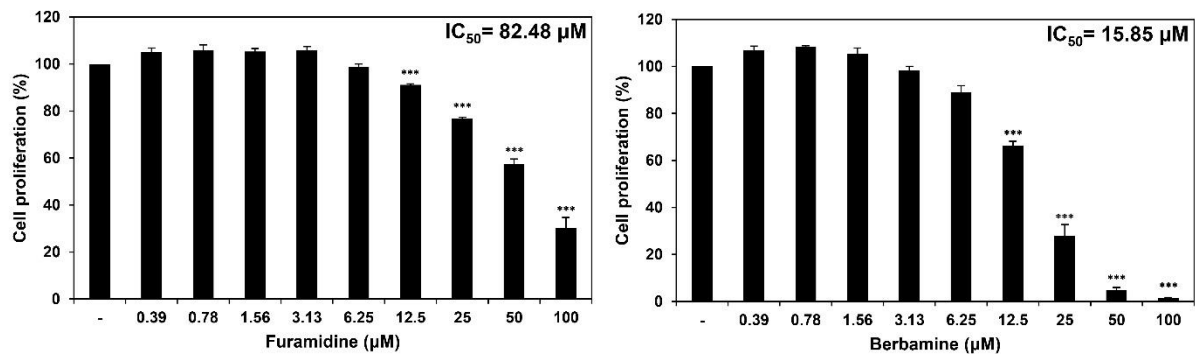

**Figure S2.** Effects of furamidine and berbamine on the proliferation of U87MG adherent cells. Cells were treated with furamidine or berbamine at various concentrations (0–100  $\mu$ M) for 72 h. Cell proliferation was measured using the CellTiter-Glo® luminescent assay system. \*\*\*  $p < 0.001$  vs. the control.

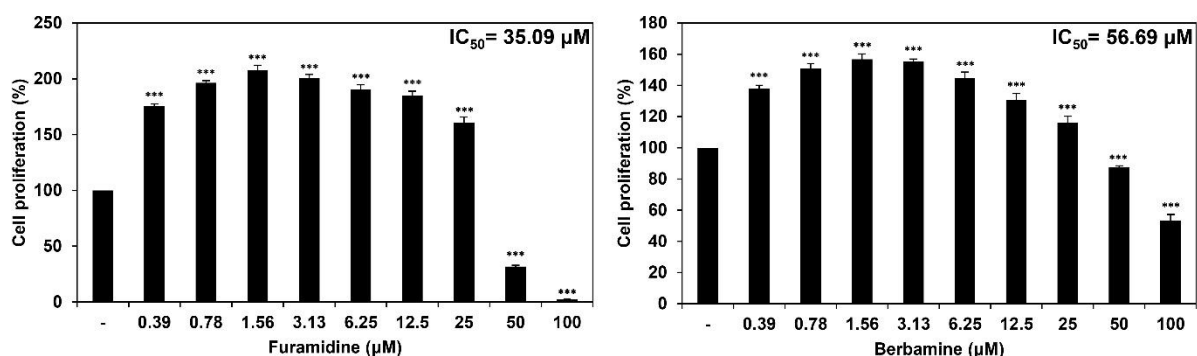

**Figure S3.** Effects of furamidine and berbamine on the proliferation of 267B1 normal prostate epithelial cells. Cells were treated with furamidine or berbamine at various concentrations (0–100  $\mu$ M) for 72 h. Cell proliferation was measured using the CellTiter-Glo® luminescent assay system. \*\*\*  $p < 0.001$  vs. the control.
